# Supplementary material for: Novel bipolar fluorescent polymers bearing N+P–O− resonance structures for fluorescent–phosphorescent (F–P) hybrid white polymer light-emitting diodes (WPLEDs)
Source: Royal Society of Chemistry journal article supplement (doi:10.1039/c6ra05264a), 2016-01-01
Supplement: c6ra05264a1.pdf [file c6ra05264a1.pdf]

## Supporting Information

### Novel Bipolar Fluorescent Polymers bearing $N^+=P-O^-$ resonance structures for Fluorescent–Phosphorescent (F-P) Hybrid White polymer light-emitting diodes (WPLEDs)

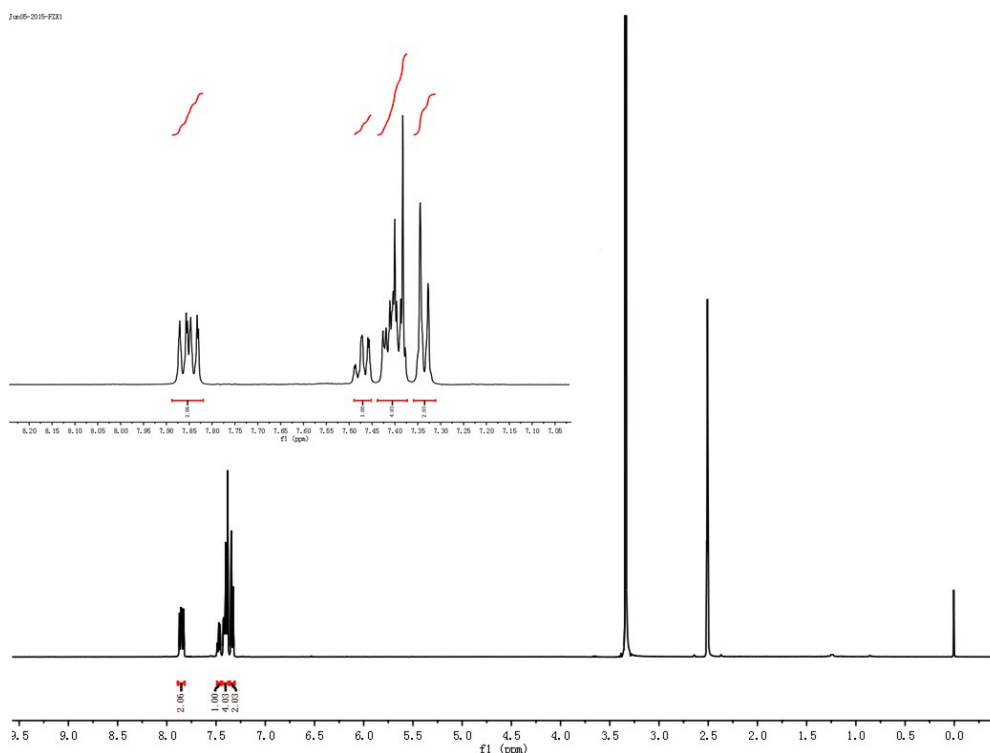

Figure S1.  $^1H$  NMR spectra of monomer M1.

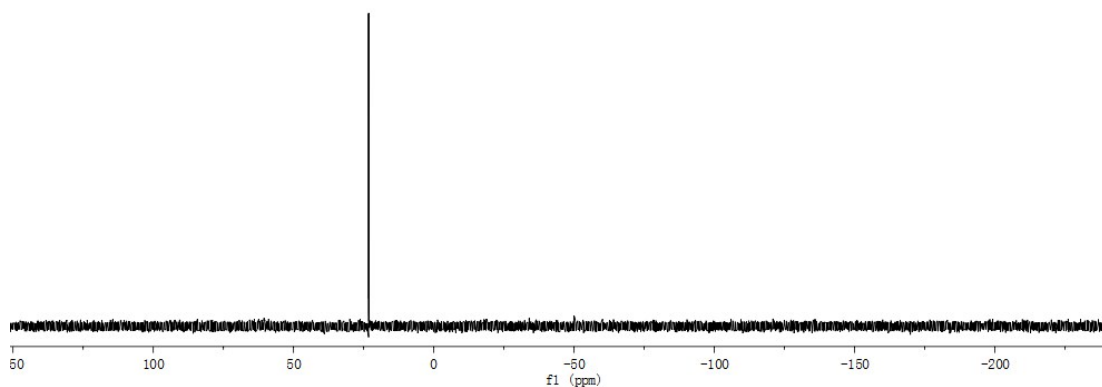

Figure S2.  $^{31}P$  NMR spectra of monomer M1.

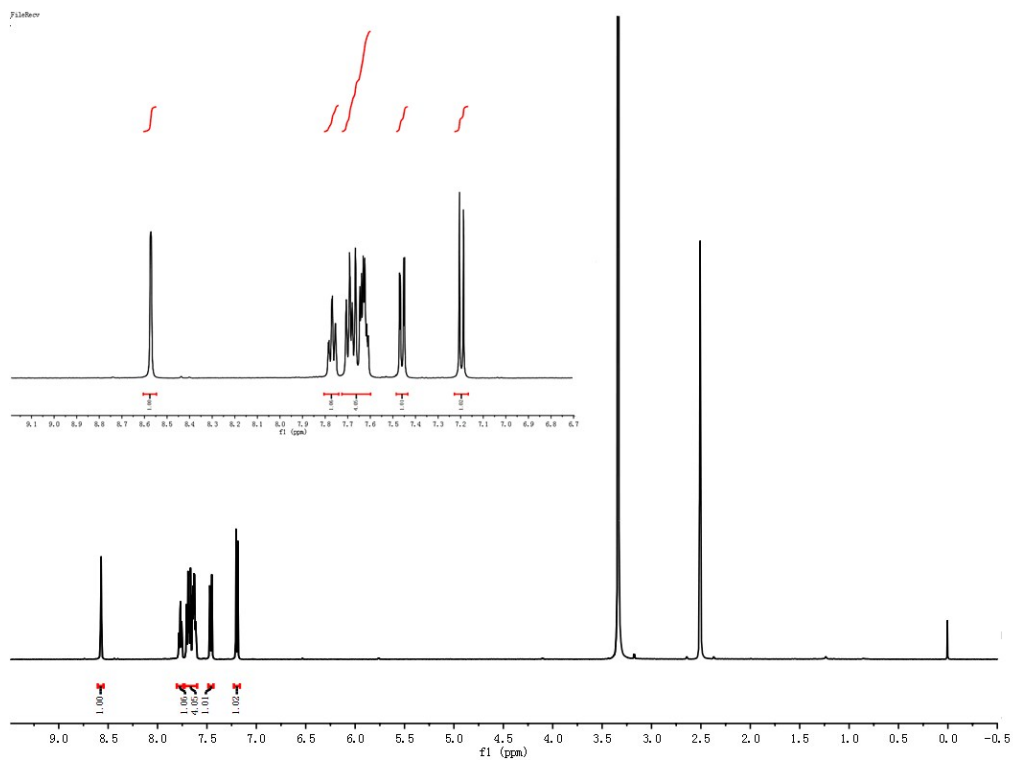

**Figure S3.**  $^1\text{H}$  NMR spectra of monomer M2.

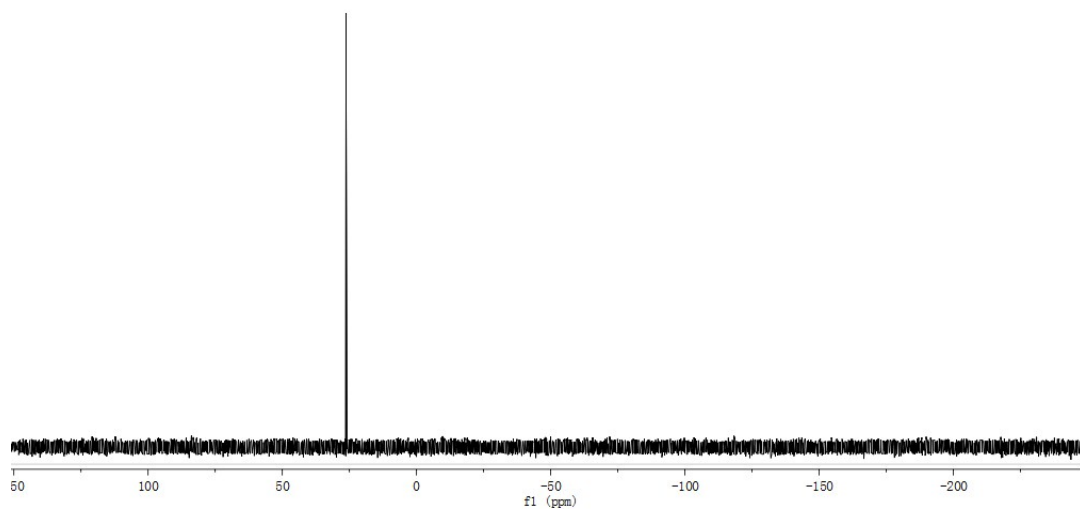

**Figure S4.**  $^{31}\text{P}$  NMR spectra of monomer M2.

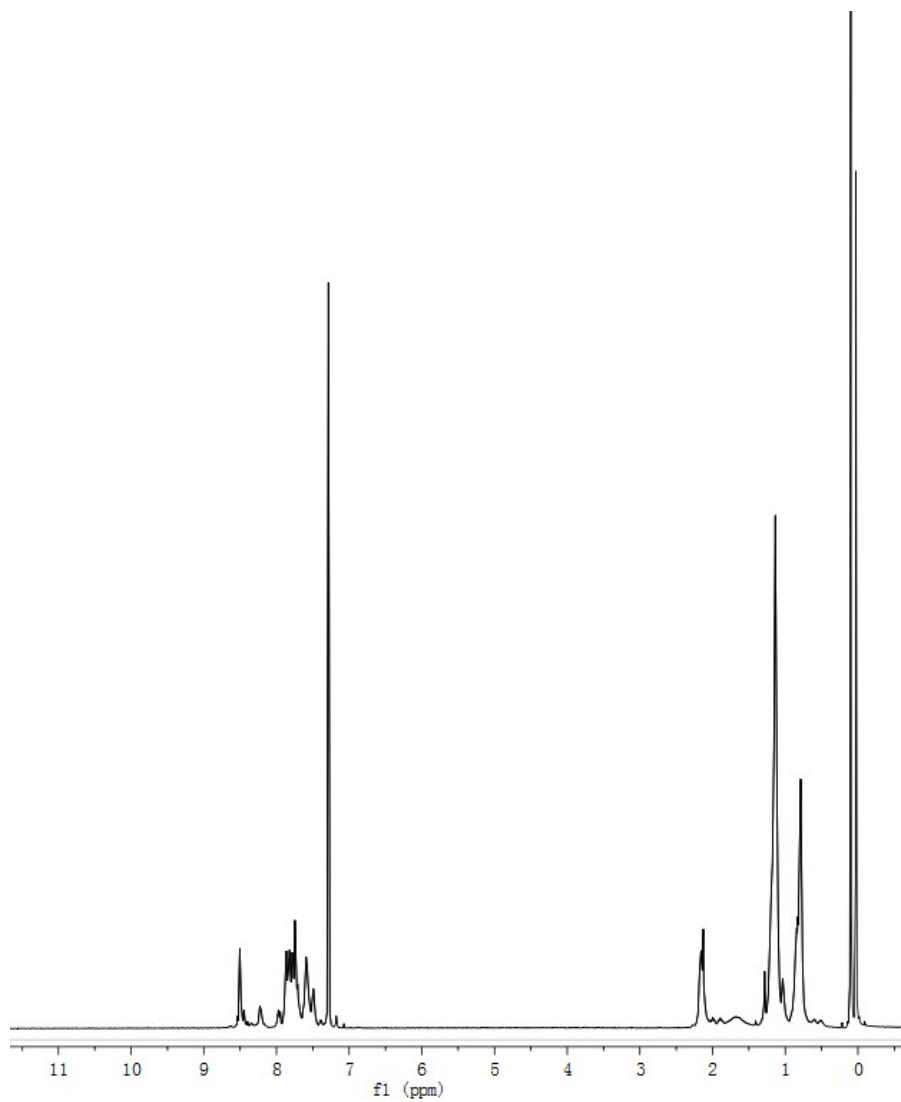

**Figure S5.**  $^1\text{H}$  NMR spectra of PPOCzF.

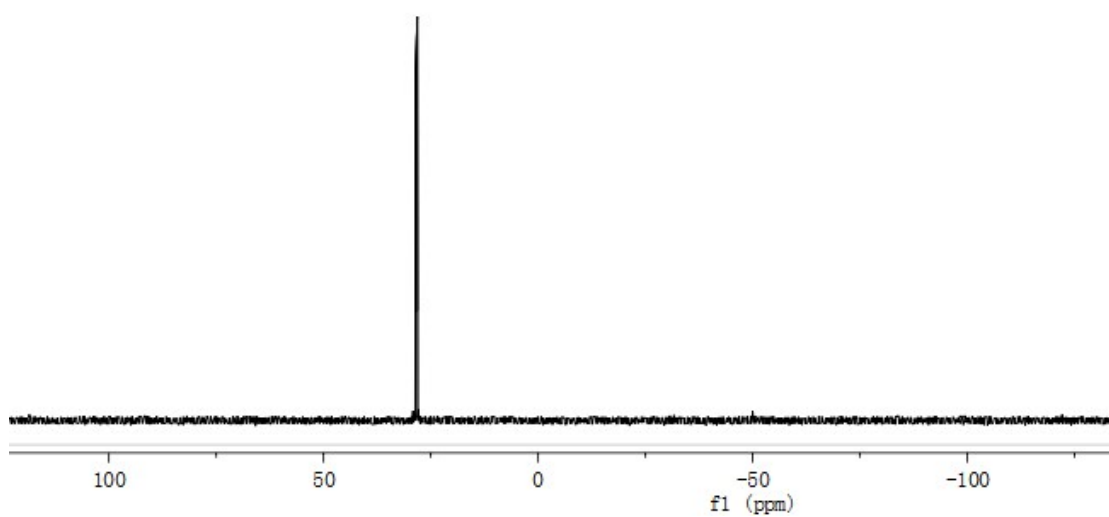

**Figure S6.**  $^{31}\text{P}$  NMR spectra of PPOCzF.

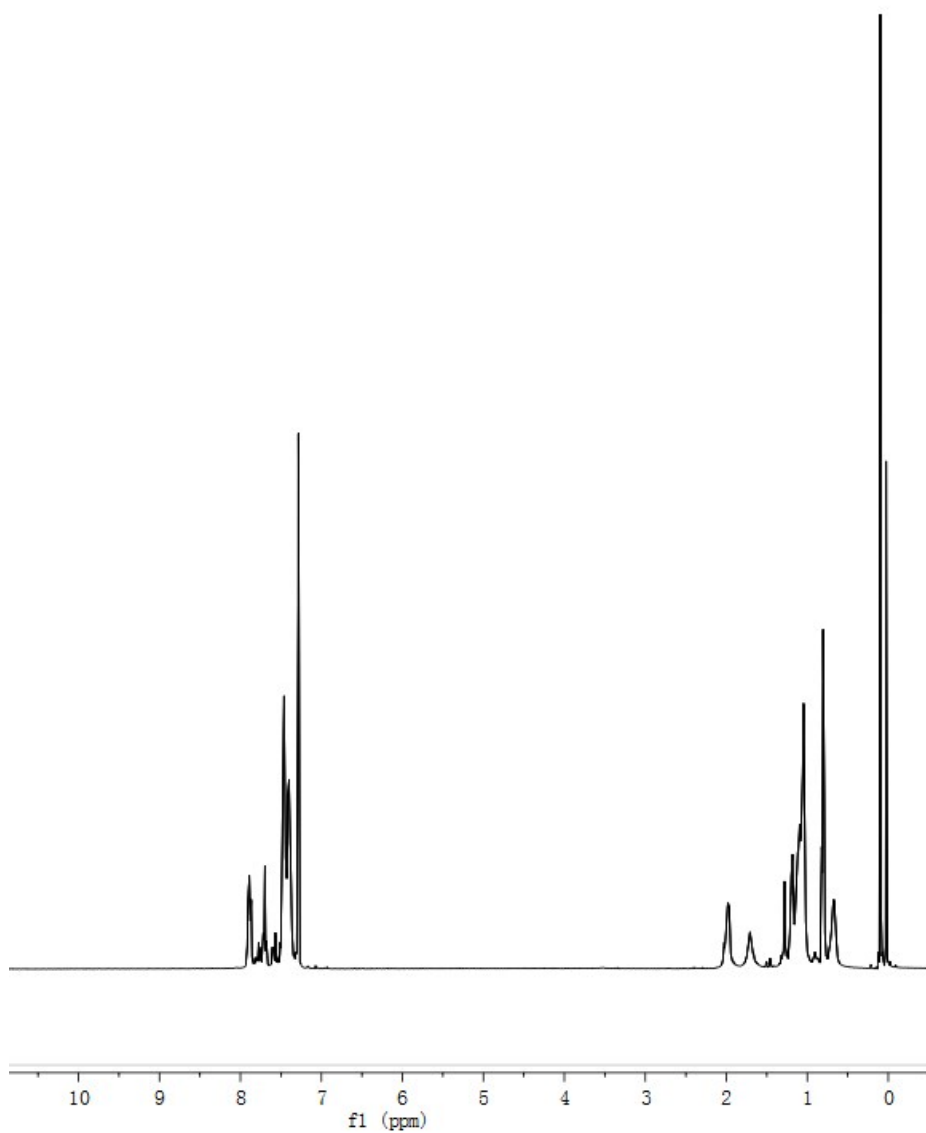

**Figure S7.**  $^1\text{H}$  NMR spectra of PPOPAF.

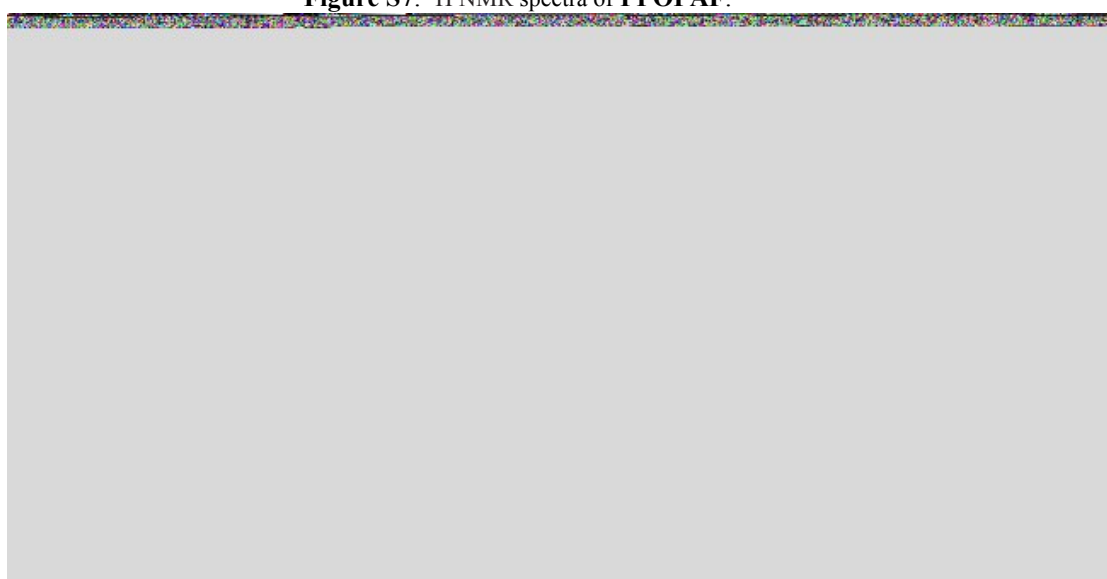

**Figure S8.**  $^{31}\text{P}$  NMR spectra of PPOPAF.

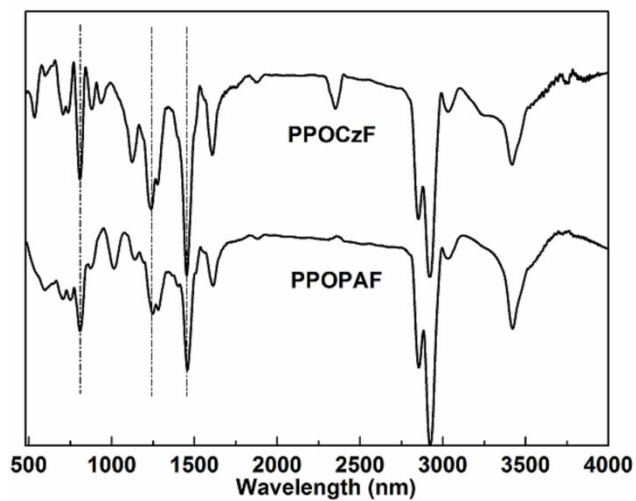

Figure S9. The FT-IR spectra of the polymers.

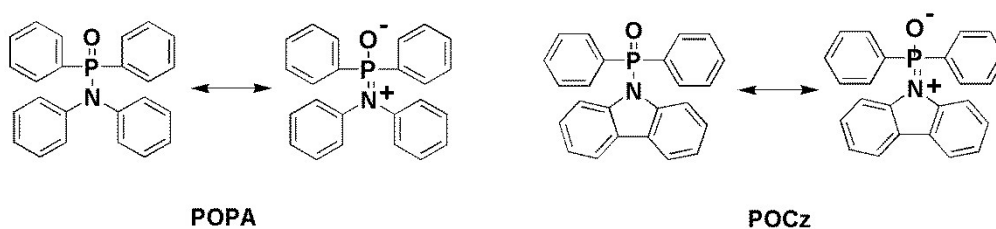

Figure S10. The most possible N-P=O resonance structures of **POPA** and **POCz** in polymers.

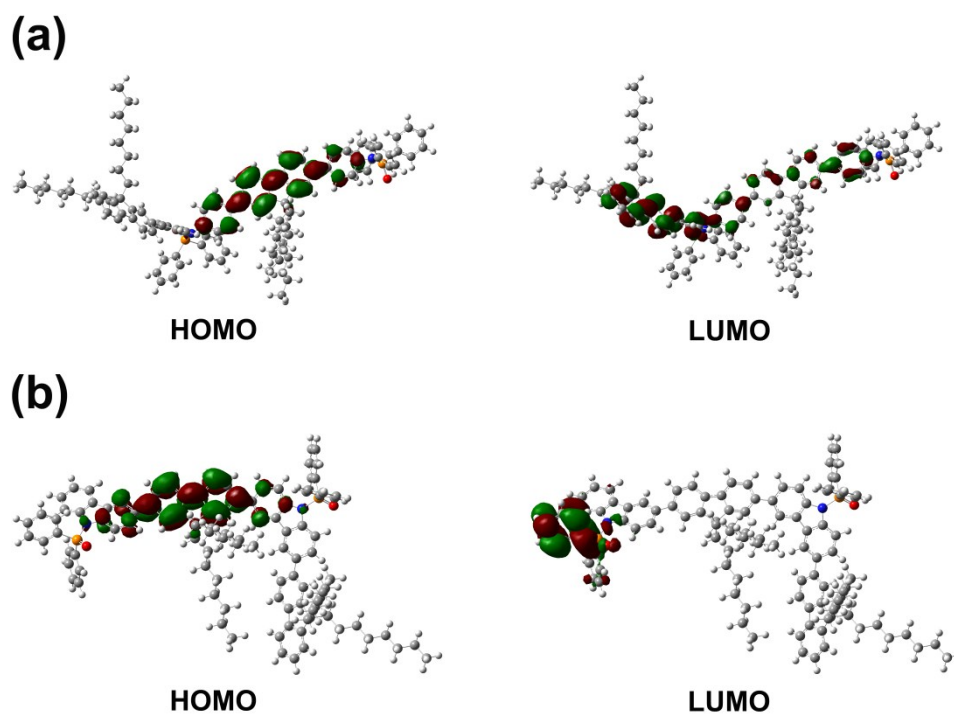

Figure S11. HOMO and LUMO distributions of the lowest excited **PPOPAF** (a) and **PPOCF** (b) calculated by B3LYP/6-31G.

Table S1. Summary of the non-doped devices performances based on PPOPAF or PPOCzF.

| EML    | $V_{on}^a$<br>[V] | $L_{max}^b$<br>[cd/m <sup>2</sup> ] | $\eta_{,max}^c$<br>[cd/A] | PE <sup>d</sup><br>[lm/W] | EQE <sub>max</sub> <sup>e</sup><br>[%] | CIE <sup>f</sup><br>coordinates |
|--------|-------------------|-------------------------------------|---------------------------|---------------------------|----------------------------------------|---------------------------------|
| PPOPAF | 6.8               | 252                                 | 0.94                      | 0.4                       | 0.97                                   | (0.16, 0.10)                    |
| PPOCzF | 7.2               | 260                                 | 1.2                       | 0.5                       | 1.2                                    | (0.17, 0.10)                    |

a) Recorded at 1 cd/m<sup>2</sup>; b) Maximum luminance; c) Maximum luminous efficiency;  
d) Maximum power efficiency; e) Maximum external quantum efficiency;  
f) at the brightness of 100 cd m<sup>-2</sup>.

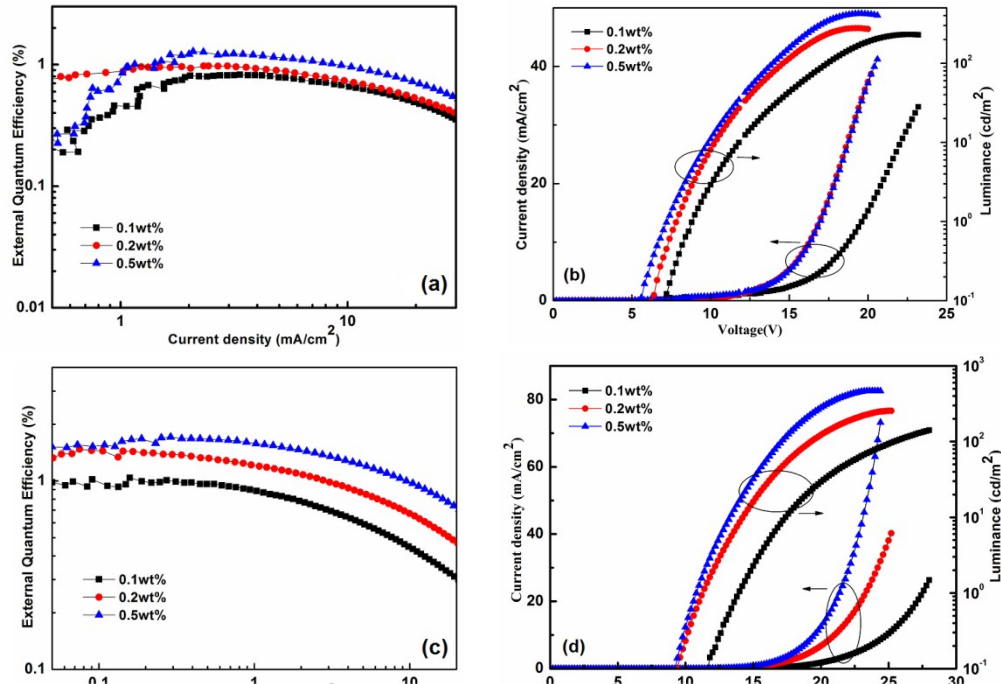

Figure S12. The EQE and  $J$ - $V$ - $L$  curves of the white device: PPOPAF (a), (b); PPOCzF (c), (d).

Table S2. Summary of the hybrid devices performances based on PPOPAF.

| Doping concentration | $V_{on}^a$<br>[V] | $\eta_{,max}^b$<br>[cd/A] | PE <sup>c</sup><br>[lm/W] | EQE <sub>max</sub> <sup>d</sup><br>[%] | $\eta_{,max}^e$<br>[cd/A] | PE <sup>e</sup><br>[lm/W] | EQE <sub>max</sub> <sup>e</sup><br>[%] | CIE<br>coordinates |
|----------------------|-------------------|---------------------------|---------------------------|----------------------------------------|---------------------------|---------------------------|----------------------------------------|--------------------|
| 0.1 wt %             | 8.8               | 1.9                       | 0.4                       | 0.83                                   | 1.7                       | 0.31                      | 0.77                                   | (0.37, 0.34)       |
| 0.2 wt %             | 7.8               | 2.3                       | 0.6                       | 0.98                                   | 2.1                       | 0.44                      | 0.91                                   | (0.35, 0.33)       |
| 0.5 wt %             | 7.2               | 3.4                       | 0.81                      | 1.3                                    | 3.3                       | 0.73                      | 1.2                                    | (0.43, 0.31)       |

a) Recorded at 1 cd/m<sup>2</sup>; b) Maximum luminous efficiency;  
c) Maximum power efficiency; d) Maximum external quantum efficiency;  
e) at the brightness of 100 cd m<sup>-2</sup>.

Table S3. Summary of the hybrid devices performances based on PPOCzF.

| Doping concentration | $V_{on}^a$<br>[V] | $\eta_{,max}^b$<br>[cd/A] | PE <sup>c</sup><br>[lm/W] | EQE <sub>max</sub> <sup>d</sup><br>[%] | $\eta_{,max}^e$<br>[cd/A] | PE <sup>e</sup><br>[lm/W] | EQE <sub>max</sub> <sup>e</sup><br>[%] | CIE <sup>e</sup><br>coordinates |
|----------------------|-------------------|---------------------------|---------------------------|----------------------------------------|---------------------------|---------------------------|----------------------------------------|---------------------------------|
| 0.1 wt %             | 13.8              | 2.1                       | 0.48                      | 1.1                                    | 0.85                      | 0.1                       | 0.4                                    | (0.35, 0.33)                    |
| 0.2 wt %             | 11.2              | 3.6                       | 0.9                       | 1.5                                    | 2.1                       | 0.3                       | 0.9                                    | (0.41, 0.38)                    |
| 0.5 wt %             | 10.8              | 4.4                       | 1.1                       | 1.7                                    | 3.5                       | 0.5                       | 1.4                                    | (0.45, 0.42)                    |

a) Recorded at 1 cd/m<sup>2</sup>; b) Maximum luminous efficiency;  
c) Maximum power efficiency; d) Maximum external quantum efficiency;  
e) at the brightness of 100 cd m<sup>-2</sup>.
